# Supplementary material for: Effect of SARS-CoV-2 BNT162b2 mRNA vaccine on thyroid autoimmunity: A twelve-month follow-up study
Source: PubMed Central journal article supplement (PMC9911871; doi:10.3389/fendo.2023.1058007), 2023-01-27

Figure S1. Flow diagram of the participants

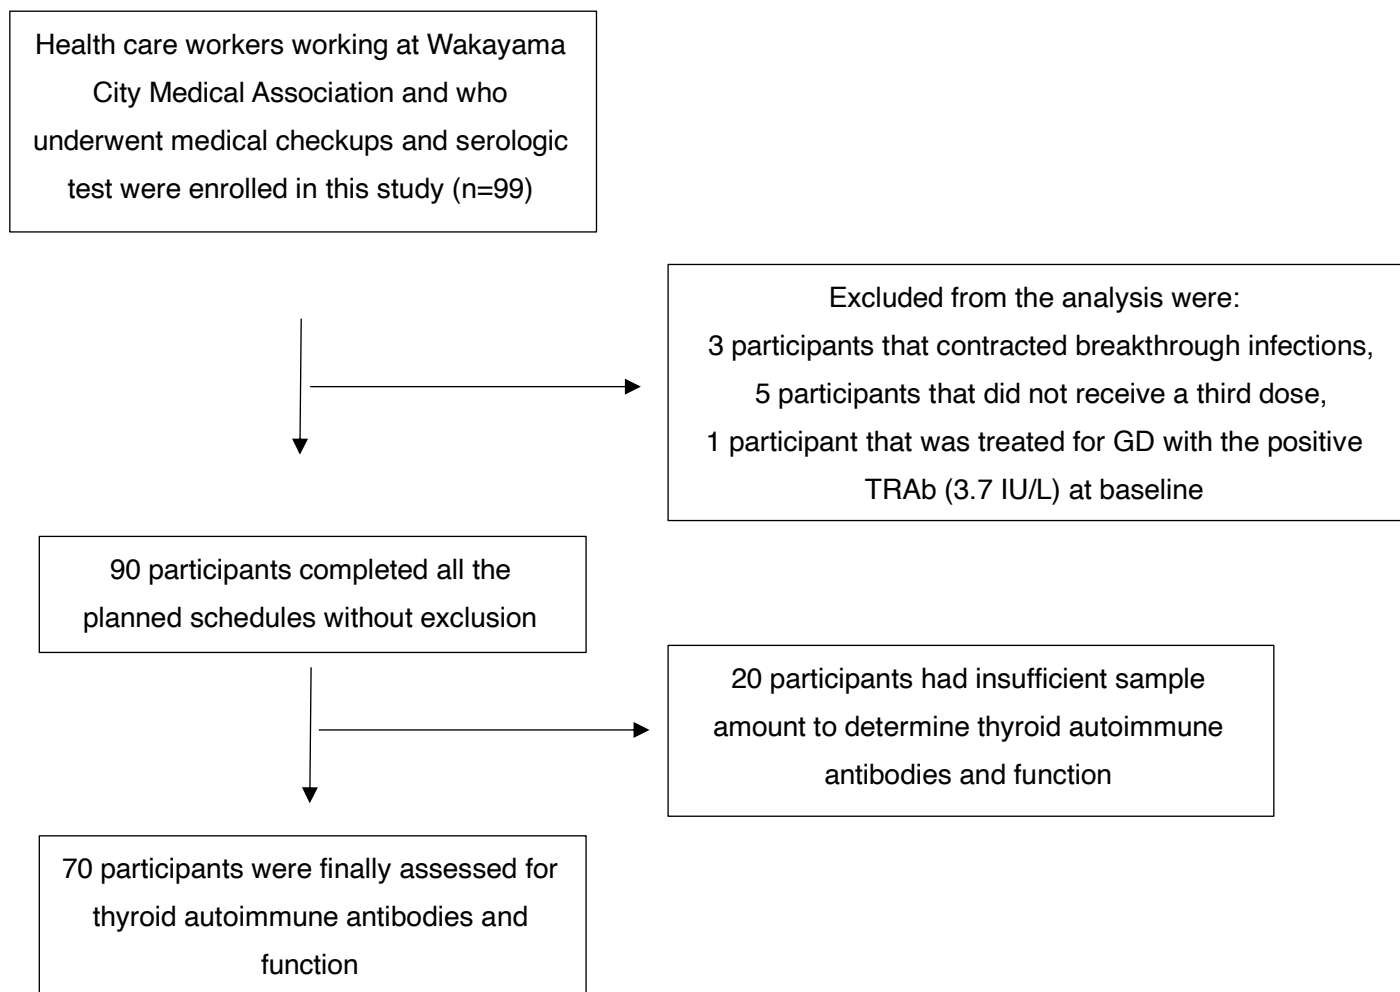

Supplement: DataSheet_1.pdf [file DataSheet_1.pdf]
